# Supplementary material for: Cooperation between international organizations: Demand, supply, and restraint
Source: Springer Nature journal article supplement (doi:10.1007/s11558-023-09506-3), 2023-09-22
Supplement: MOESM1 [file 26074570]

## Online Appendix

Table A1: List of international organizations included in the IOCA dataset

| IO      | Full Name                                                                      | Start        | End  | Region   |
|---------|--------------------------------------------------------------------------------|--------------|------|----------|
| AC      | Arctic Council                                                                 | 1996         |      | Europe   |
| ACC     | Arab Cooperation Council                                                       | 1989         | 1990 | Asia     |
| ACD     | Asia Cooperation Dialogue                                                      | 2001         |      | Asia     |
| ACS     | Association of Caribbean States                                                | 1994         |      | Americas |
| ACTO    | Amazonian Cooperation Treaty Organization                                      | 1995         |      | Americas |
| AL      | League of Arab States                                                          | 1945         |      | Africa   |
| ALADI   | Latin American Integration Association                                         | 1960         |      | Americas |
| ALBA    | Bolivarian Alliance for the Peoples of Our Americas                            | 2004         |      | Americas |
| AMU     | Arab Maghreb Union                                                             | 1989         |      | Africa   |
| ANDEAN  | Andean Community                                                               | 1969         |      | Americas |
| APEC    | Asia-Pacific Economic Cooperation                                              | 1989         |      | Asia     |
| ASEAN   | Association of Southeast Asian Nations                                         | 1967         |      | Asia     |
| AU      | African Union                                                                  | 1963         |      | Africa   |
| BEU     | Benelux Economic Union                                                         | 1958         |      | Europe   |
| BIMSTEC | Bay of Bengal Initiative for Multi-Sectoral Technical and Economic Cooperation | 1997         |      | Asia     |
| BSEC    | Black Sea Economic Cooperation                                                 | 1992         |      | Asia     |
| CACM    | Central American Common Market                                                 | 1960         |      | Americas |
| CAEU    | Council of Arab Economic Unity                                                 | 1964         |      | Africa   |
| CAREC   | Central Asia Regional Economic Cooperation                                     | 1997         |      | Asia     |
| CARICOM | Caribbean Community                                                            | 1965         |      | Americas |
| CCTS    | Cooperation Council of Turkic Speaking States                                  | 2009         |      | Asia     |
| CE      | Conseil de l'Entente                                                           | 1959         |      | Africa   |
| CEEAC   | Communauté Economique des États de l'Afrique Centrale                          | 1983         |      | Africa   |
| CEFTA   | Central European Free Trade Agreement                                          | 1992         |      | Europe   |
| CEI     | Central European Initiative                                                    | 1989         |      | Europe   |
| CELAC   | Community of Latin American and Caribbean States                               | 2011         |      | Americas |
| CEMAC   | Communauté économique et monétaire de l'Afrique centrale                       | 1991         |      | Africa   |
| CENSAD  | Community of Sahel-Saharan States                                              | 1998         |      | Africa   |
| CEPGL   | Economic Community of the Great Lakes Countries                                | 1976         |      | Africa   |
| CICA    | Conference on Interaction and Confidence Building Measures in Asia             | 1999         |      | Asia     |
| CIS     | Commonwealth of Independent States                                             | 1991         |      | Europe   |
| CoE     | Council of Europe                                                              | 1949         |      | Europe   |
| COMESA  | Common Market for Eastern and Southern Africa                                  | 1993         |      | Africa   |
| CSTO    | Collective Security Treaty (Organization)                                      | 1992         |      | Europe   |
| EAC     | East African Community                                                         | 1967<br>1999 | 1977 | Africa   |
| EAEU    | Eurasian Economic Union                                                        | 2000         |      | Europe   |
| ECO     | Economic Cooperation Organization                                              | 1985         |      | Asia     |
| ECOWAS  | Economic Community of West African States                                      | 1975         |      | Africa   |
| EFTA    | European Free Trade Association                                                | 1960         |      | Europe   |
| EU      | European Union                                                                 | 1951         |      | Europe   |

Table A1 (continued)

| <b>IO</b> | <b>Full Name</b>                                     | <b>Start</b> | <b>End</b> | <b>Region</b> |
|-----------|------------------------------------------------------|--------------|------------|---------------|
| G5S       | G5 du Sahel                                          | 2014         |            | Africa        |
| GCC       | Gulf Cooperation Council                             | 1981         |            | Asia          |
| GGC       | Gulf of Guinea Commission                            | 2001         |            | Africa        |
| GUAM      | Organization for Democracy and Economic Development  | 1997         |            | Europe        |
| ICGLR     | International Conference on the Great Lakes Region   | 2004         |            | Africa        |
| IGAD      | Intergovernmental Authority on Development           | 1986         |            | Africa        |
| IOC       | Indian Ocean Commission                              | 1984         |            | Africa        |
| IORA      | Indian Ocean Rim Association                         | 1997         |            | Africa        |
| LCBC      | Lake Chad Basin Commission                           | 1964         |            | Africa        |
| MERCOSUR  | Mercado Comun del Sur                                | 1994         |            | Americas      |
| MGC       | Mekong-Ganga Cooperation                             | 2000         |            | Asia          |
| MRU       | Mano River Union                                     | 1973         |            | Africa        |
| MSG       | Melanesian Spearhead Group                           | 2007         |            | Asia          |
| NAFTA     | North American Free Trade Organization               | 1994         |            | Americas      |
| NATO      | North Atlantic Treaty Organization                   | 1949         |            | Europe        |
| NC        | Nordic Council                                       | 1952         |            | Europe        |
| OAS       | Organization of American States                      | 1948         |            | Americas      |
| ODECA     | Organization of Central American States              | 1951         | 1973       | Americas      |
| OECS      | Organisation of Eastern Caribbean States             | 1981         |            | Americas      |
| OSCE      | Organisation for Security and Co-operation in Europe | 1975         |            | Europe        |
| PIF       | Pacific Islands Forum                                | 1971         |            | Asia          |
| SAARC     | South Asian Association for Regional Cooperation     | 1985         |            | Asia          |
| SACU      | Southern African Customs Union                       | 1945         |            | Africa        |
| SADC      | Southern African Development Community               | 1980         |            | Africa        |
| SCO       | Shanghai Cooperation Organization                    | 2001         |            | Asia          |
| SEATO     | Southeast Asia Treaty Organization                   | 1954         | 1977       | Asia          |
| SELA      | Latin American Economic System                       | 1975         |            | Americas      |
| SICA      | Central American Integration System                  | 1991         |            | Americas      |
| SPC       | Pacific Community                                    | 1947         |            | Asia          |
| UEMOA     | West African Economic and Monetary Union             | 1994         |            | Africa        |
| UNASUR    | Union of South American Nations                      | 2008         |            | Americas      |
| WEU       | Western European Union                               | 1954         | 2010       | Europe        |
| WTO       | Warsaw Treaty Organisation                           | 1955         | 1991       | Europe        |

Table A2: Summary statistics

| Variable                        | Observations | Mean     | Standard Deviation | Min | Max      |
|---------------------------------|--------------|----------|--------------------|-----|----------|
| likelihood of cooperation       | 10,452       | 0.167    | 0.373              | 0   | 1        |
| overall institutionalization    | 10,452       | 17.406   | 51.984             | 0   | 640.15   |
| treaty form                     | 10,452       | 23.268   | 69.055             | 0   | 800      |
| scope                           | 10,452       | 9.148    | 29.505             | 0   | 445.45   |
| depth of instruments            | 10,452       | 19.800   | 63.422             | 0   | 725      |
| number shared member states     | 11,903       | 4.434    | 4.956              | 0   | 47       |
| number shared competencies      | 11,903       | 12.791   | 12.454             | 0   | 82       |
| disposition towards cooperation | 10,416       | 32.495   | 5.457              | 10  | 47.67    |
| delegation                      | 11,862       | 0.072    | 0.259              | 0   | 1        |
| ideological differences         | 11,305       | 0.136    | 0.131              | 0   | 0.66     |
| power differential              | 11,451       | 9993.083 | 11746.420          | 0   | 62329.36 |
| dyad age (control)              | 10,496       | 16.630   | 13.507             | 1   | 73       |
| core mandate (control)          | 11,903       | 1.293    | 0.648              | 0   | 2        |
| cooperation (robustness check)  | 10,452       | 0.167    | 0.373              | 0   | 1        |

Table A3: Correlation matrix

|                                  | number of<br>shared member<br>states | number of<br>identical<br>competencies | disposition<br>towards<br>cooperation | delegation | ideological<br>differences | power<br>differential | control:<br>dyad age | control:<br>core<br>mandate |
|----------------------------------|--------------------------------------|----------------------------------------|---------------------------------------|------------|----------------------------|-----------------------|----------------------|-----------------------------|
| number of shared member states   | 1                                    |                                        |                                       |            |                            |                       |                      |                             |
| number of identical competencies | 0.042                                | 1                                      |                                       |            |                            |                       |                      |                             |
| disposition towards cooperation  | 0.099                                | 0.048                                  | 1                                     |            |                            |                       |                      |                             |
| delegation                       | 0.120                                | 0.253                                  | -0.017                                | 1          |                            |                       |                      |                             |
| ideological differences          | -0.215                               | 0.034                                  | -0.029                                | -0.053     | 1                          |                       |                      |                             |
| power differential               | 0.026                                | 0.176                                  | 0.260                                 | -0.062     | 0.258                      | 1                     |                      |                             |
| control: dyad age                | 0.217                                | -0.024                                 | 0.264                                 | 0.138      | -0.098                     | 0.126                 | 1                    |                             |
| control: core mandate            | -0.102                               | 0.205                                  | -0.120                                | 0.006      | -0.031                     | -0.043                | -0.129               | 1                           |

Table A4: Robustness check – bivariate models

|                                               | model 1<br>overall     | model 2<br>overall      | model 3<br>overall      | model 4<br>overall   | model 5<br>overall     | model 6<br>overall    | model 7<br>overall    |
|-----------------------------------------------|------------------------|-------------------------|-------------------------|----------------------|------------------------|-----------------------|-----------------------|
| outcome part:                                 |                        |                         |                         |                      |                        |                       |                       |
| institutionalization of cooperation agreement |                        |                         |                         |                      |                        |                       |                       |
| number of shared member states                | 4.184***<br>(1.049)    | 4.568***<br>(0.963)     |                         |                      |                        |                       |                       |
| number of identical competencies              | 2.051***<br>(0.456)    |                         | 1.755***<br>(0.384)     |                      |                        |                       |                       |
| disposition towards cooperation               | -3.459*<br>(1.358)     |                         |                         | -3.784**<br>(1.428)  |                        |                       |                       |
| delegation                                    | 107.278***<br>(23.705) |                         |                         |                      | 127.705***<br>(21.917) |                       |                       |
| ideological differences                       | -104.563**<br>(38.204) |                         |                         |                      |                        | -99.665*<br>(39.160)  |                       |
| power differential                            | -0.001<br>(0.001)      |                         |                         |                      |                        |                       | -0.002***<br>(0.001)  |
| control: dyad age                             | 4.994***<br>(0.647)    | 4.942***<br>(0.526)     | 5.103***<br>(0.480)     | 6.164***<br>(0.599)  | 5.149***<br>(0.440)    | 5.242***<br>(0.373)   | 5.721***<br>(0.538)   |
| control: core mandate                         | 5.952<br>(6.369)       | 17.826<br>(10.902)      | 5.208<br>(9.887)        | 21.879*<br>(11.141)  | 0.403<br>(8.011)       | 16.296<br>(9.298)     | 6.742<br>(9.486)      |
| constant                                      | -1.807<br>(30.031)     | -121.344***<br>(19.125) | -102.205***<br>(26.930) | 12.349<br>(39.799)   | -78.975***<br>(21.535) | -81.990**<br>(28.020) | -71.956**<br>(26.880) |
| selection part:                               |                        |                         |                         |                      |                        |                       |                       |
| likelihood of cooperation agreement           |                        |                         |                         |                      |                        |                       |                       |
| number of shared member states                | 0.073***<br>(0.003)    | 0.079***<br>(0.003)     |                         |                      |                        |                       |                       |
| number of identical competencies              | 0.013***<br>(0.001)    |                         | 0.017***<br>(0.001)     |                      |                        |                       |                       |
| disposition towards cooperation               | 0.027***<br>(0.003)    |                         |                         | 0.011***<br>(0.002)  |                        |                       |                       |
| delegation                                    | 0.949***<br>(0.028)    |                         |                         |                      | 1.205***<br>(0.027)    |                       |                       |
| ideological differences                       | -0.921***<br>(0.200)   |                         |                         |                      |                        | -1.930***<br>(0.154)  |                       |
| power differential                            | -0.000***<br>(0.000)   |                         |                         |                      |                        |                       | -0.000***<br>(0.000)  |
| control: dyad age                             | 0.018***<br>(0.001)    | 0.021***<br>(0.001)     | 0.026***<br>(0.001)     | 0.025***<br>(0.001)  | 0.023***<br>(0.001)    | 0.024***<br>(0.001)   | 0.027***<br>(0.001)   |
| control: core mandate                         | -0.104***<br>(0.019)   | -0.020<br>(0.014)       | -0.145***<br>(0.016)    | -0.063***<br>(0.014) | -0.087***<br>(0.016)   | -0.071***<br>(0.015)  | -0.081***<br>(0.015)  |
| constant                                      | -2.548***<br>(0.120)   | -1.782***<br>(0.036)    | -1.511***<br>(0.035)    | -1.732***<br>(0.075) | -1.418***<br>(0.039)   | -1.121***<br>(0.042)  | -1.259***<br>(0.035)  |
| _cons                                         | 3.735***<br>(0.054)    | 3.881***<br>(0.082)     | 3.883***<br>(0.079)     | 3.892***<br>(0.076)  | 3.861***<br>(0.080)    | 3.820***<br>(0.054)   | 3.814***<br>(0.054)   |
| N                                             | 9857                   | 10452                   | 10452                   | 10416                | 10434                  | 9917                  | 10048                 |
| AIC                                           | 22439.943              | 25534.404               | 26074.011               | 26090.877            | 25568.745              | 24034.728             | 24819.517             |
| BIC                                           | 22871.699              | 25926.149               | 26465.756               | 26475.185            | 25960.398              | 24394.828             | 25187.488             |

Standard errors in parentheses: \* p<0.05, \*\* p<0.01, \*\*\* p<0.001

Table A5: Robustness check with MIA delegation data

|                                               | model 1<br>overall      | model 2<br>form         | model 3<br>scope        | model 4<br>depth of instruments |
|-----------------------------------------------|-------------------------|-------------------------|-------------------------|---------------------------------|
| outcome part:                                 |                         |                         |                         |                                 |
| institutionalization of cooperation agreement |                         |                         |                         |                                 |
| number of shared member states                | 3.814***<br>(1.068)     | 6.888***<br>(1.490)     | -2.268***<br>(0.538)    | 6.428***<br>(1.546)             |
| number of identical competencies              | 2.221***<br>(0.474)     | 2.155***<br>(0.623)     | 2.550***<br>(0.326)     | 2.625***<br>(0.637)             |
| disposition towards cooperation               | -3.342*<br>(1.456)      | -3.475<br>(1.789)       | -3.157**<br>(1.084)     | -4.449*<br>(1.888)              |
| delegation                                    | 179.595**<br>(59.112)   | 258.313***<br>(77.755)  | -5.152<br>(43.425)      | 302.504***<br>(83.226)          |
| ideological differences                       | -255.859***<br>(40.680) | -326.620***<br>(56.819) | -220.318***<br>(37.777) | -277.843***<br>(56.435)         |
| power differential                            | -0.001<br>(0.001)       | -0.001<br>(0.001)       | 0.000<br>(0.001)        | -0.003*<br>(0.001)              |
| control: dyad age                             | 4.910***<br>(0.782)     | 6.130***<br>(0.939)     | 3.769***<br>(0.477)     | 6.459***<br>(1.043)             |
| control: core mandate                         | 14.061<br>(8.543)       | 8.382<br>(13.433)       | 24.055***<br>(6.552)    | -3.829<br>(9.120)               |
| constant                                      | -16.149<br>(68.105)     | -40.150<br>(82.027)     | 43.214<br>(57.179)      | -48.596<br>(33.593)             |
| selection part:                               |                         |                         |                         |                                 |
| likelihood of cooperation agreement           |                         |                         |                         |                                 |
| number of shared member states                | 0.074***<br>(0.003)     | 0.074***<br>(0.003)     | 0.077***<br>(0.003)     | 0.074***<br>(0.003)             |
| number of identical competencies              | 0.018***<br>(0.001)     | 0.018***<br>(0.001)     | 0.019***<br>(0.001)     | 0.017***<br>(0.001)             |
| disposition towards cooperation               | 0.020***<br>(0.002)     | 0.020***<br>(0.002)     | 0.015***<br>(0.002)     | 0.021***<br>(0.002)             |
| delegation                                    | 0.819***<br>(0.073)     | 0.819***<br>(0.073)     | 1.100***<br>(0.088)     | 0.721***<br>(0.072)             |
| ideological differences                       | -1.013***<br>(0.195)    | -1.013***<br>(0.195)    | -1.221***<br>(0.204)    | -0.904***<br>(0.199)            |
| power differential                            | -0.000***<br>(0.000)    | -0.000***<br>(0.000)    | -0.000***<br>(0.000)    | -0.000***<br>(0.000)            |
| control: dyad age                             | 0.019***<br>(0.001)     | 0.019***<br>(0.001)     | 0.018***<br>(0.001)     | 0.019***<br>(0.001)             |
| control: core mandate                         | -0.115***<br>(0.020)    | -0.115***<br>(0.020)    | -0.002<br>(0.026)       | -0.094***<br>(0.022)            |
| constant                                      | -2.387***<br>(0.098)    | -2.387***<br>(0.098)    | -2.476***<br>(0.104)    | -2.476***<br>(0.101)            |
| constant                                      | 3.780***<br>(0.053)     | 4.092***<br>(0.050)     | 3.332***<br>(0.038)     | 4.014***<br>(0.060)             |
| observations                                  | 8250                    | 8250                    | 8250                    | 8250                            |
| AIC                                           | 21339.211               | 22328.810               | 18793.763               | 21039.618                       |
| BIC                                           | 21760.289               | 22742.870               | 19207.823               | 21446.660                       |

Standard errors in parentheses: \* p<0.05, \*\* p<0.01, \*\*\* p<0.001

Table A6: Robustness check – time series cross-sectional models

|                                  | model 1<br>likelihood of<br>cooperation | model 2<br>institutionalization<br>of cooperation | model 3<br>form         | model 4<br>scope        | model 5<br>depth of<br>instruments |
|----------------------------------|-----------------------------------------|---------------------------------------------------|-------------------------|-------------------------|------------------------------------|
| number of shared member states   | 1.372***<br>(0.062)                     | 6.092***<br>(0.536)                               | 9.095***<br>(0.712)     | 1.473***<br>(0.249)     | 8.726***<br>(0.726)                |
| number of identical competencies | 0.325***<br>(0.041)                     | 3.113***<br>(0.218)                               | 3.776***<br>(0.292)     | 1.453***<br>(0.103)     | 4.171***<br>(0.290)                |
| disposition towards cooperation  | 0.586***<br>(0.106)                     | 0.295<br>(0.681)                                  | 0.935<br>(0.902)        | 1.018**<br>(0.317)      | 0.764<br>(0.916)                   |
| delegation                       | 14.878***<br>(2.078)                    | 83.715***<br>(8.155)                              | 134.340***<br>(10.877)  | 26.065***<br>(4.202)    | 93.440***<br>(10.752)              |
| ideological differences          | -12.116<br>(7.470)                      | -169.744***<br>(37.581)                           | -218.264***<br>(50.077) | -76.107***<br>(16.333)  | -160.648**<br>(49.290)             |
| power differential               | -0.001***<br>(0.000)                    | -0.002***<br>(0.000)                              | -0.002***<br>(0.000)    | -0.000<br>(0.000)       | -0.003***<br>(0.001)               |
| control: dyad age                | 1.419***<br>(0.049)                     | 4.598***<br>(0.235)                               | 5.924***<br>(0.315)     | 2.445***<br>(0.105)     | 5.435***<br>(0.319)                |
| control: core mandate            | 0.543<br>(1.226)                        | 28.958***<br>(6.669)                              | 10.657<br>(8.828)       | 27.432***<br>(2.985)    | 26.942**<br>(8.794)                |
| constant                         | -86.028***<br>(3.974)                   | -439.545***<br>(22.489)                           | -546.060***<br>(30.372) | -196.750***<br>(10.107) | -557.311***<br>(30.282)            |
| observations                     | 9397                                    | 9397                                              | 9397                    | 9397                    | 9397                               |
| AIC                              | 1050.957                                | 19298.736                                         | 20231.346               | 17463.790               | 19588.823                          |
| BIC                              | 1122.439                                | 19377.366                                         | 20309.975               | 17542.420               | 19667.453                          |

Standard errors in parentheses: \* p<0.05, \*\* p<0.01, \*\*\* p<0.001

Table A7: Robustness check – time series cross-sectional models without time lags

|                                  | model 1<br>likelihood of<br>cooperation | model 2<br>institutionalization<br>of cooperation | model 3<br>form         | model 4<br>scope       | model 5<br>depth of<br>instruments |
|----------------------------------|-----------------------------------------|---------------------------------------------------|-------------------------|------------------------|------------------------------------|
| number of shared member states   | 0.653***<br>(0.050)                     | 5.545***<br>(0.544)                               | 8.470***<br>(0.715)     | 1.395***<br>(0.214)    | 8.014***<br>(0.729)                |
| number of identical competencies | 0.148***<br>(0.029)                     | 3.428***<br>(0.234)                               | 4.210***<br>(0.307)     | 1.361***<br>(0.092)    | 4.573***<br>(0.309)                |
| disposition towards cooperation  | 0.086<br>(0.066)                        | -0.379<br>(0.685)                                 | 0.353<br>(0.891)        | 0.974***<br>(0.270)    | -0.048<br>(0.909)                  |
| delegation                       | 7.836***<br>(1.232)                     | 87.020***<br>(8.563)                              | 134.054***<br>(11.274)  | 33.136***<br>(3.889)   | 97.517***<br>(11.089)              |
| ideological differences          | -4.537<br>(3.902)                       | -221.752***<br>(38.605)                           | -277.917***<br>(50.718) | -70.928***<br>(14.277) | -232.280***<br>(50.352)            |
| power differential               | -0.000**<br>(0.000)                     | -0.001**<br>(0.000)                               | -0.001*<br>(0.000)      | -0.000<br>(0.000)      | -0.002***<br>(0.000)               |
| control: dyad age                | 0.803***<br>(0.029)                     | 4.634***<br>(0.230)                               | 5.892***<br>(0.301)     | 2.256***<br>(0.087)    | 5.462***<br>(0.305)                |
| control: core mandate            | -1.959***<br>(0.562)                    | 28.072***<br>(6.756)                              | 6.610<br>(8.815)        | 18.987***<br>(2.502)   | 30.880***<br>(8.805)               |
| constant                         | -38.735***<br>(2.140)                   | -431.171***<br>(22.605)                           | -534.863***<br>(29.859) | -179.010***<br>(8.569) | -541.778***<br>(29.678)            |
| observations                     | 9857                                    | 9857                                              | 9857                    | 9857                   | 9857                               |
| AIC                              | 1135.585                                | 18623.392                                         | 19510.104               | 17434.484              | 18848.045                          |
| BIC                              | 1207.545                                | 18702.547                                         | 19589.259               | 17513.640              | 18927.200                          |

Standard errors in parentheses: \* p<0.05, \*\* p<0.01, \*\*\* p<0.001

Table A8: Marginal Effects – Likelihood of Cooperation Agreements

| variable                         | dy/dx   | standard error | z     | P>z | [95% conf. | interval] |
|----------------------------------|---------|----------------|-------|-----|------------|-----------|
| number of shared member states   | 0.0129  | 0.0008         | 17.07 | 0.0 | 0.0114     | 0.0144    |
| number of identical competencies | 0.0022  | 0.0003         | 9.15  | 0.0 | 0.0018     | 0.0027    |
| disposition towards cooperation  | 0.2526  | 0.0214         | 11.82 | 0.0 | 0.2107     | 0.2945    |
| delegation                       | 0.0046  | 0.0007         | 7.09  | 0.0 | 0.0034     | 0.0059    |
| ideological differences          | -0.1827 | 0.0334         | -5.48 | 0.0 | -0.2480    | -0.1173   |
| power differential               | 0.0000  | 0.0000         | -9.12 | 0.0 | 0.0000     | 0.0000    |

Table A9: Marginal Effects – Institutionalization of Inter-Organizational Cooperation

|                                  | dy/dx   | standard error | z      | P>z   | [95% conf. interval] |
|----------------------------------|---------|----------------|--------|-------|----------------------|
| number of shared member states   | 1.572   | 0.720          | 2.180  | 0     | 0.160 2.983          |
| number of identical competencies | 0.772   | 0.333          | 2.320  | 0     | 0.119 1.425          |
| disposition towards cooperation  | 40.372  | 10.356         | 3.900  | 0.000 | 20.074 60.670        |
| delegation                       | -1.314  | 0.364          | -3.610 | 0.000 | -2.027 -0.600        |
| ideological differences          | -39.509 | 17.473         | -2.260 | 0.024 | -73.756 -5.262       |
| power differential               | 0.000   | 0.000          | -1.980 | 0.048 | -0.001 0.000         |
